# Supplementary material for: Chromosome-resolved genome assemblies of Rhodotorula toruloides reveal abnormal chromosomal evolution under artificial culture conditions
Source: Research Square preprint supplement (doi:10.21203/rs.3.rs-7353730/v1), 2025-09-01
Supplement: Supplementary file 1 [file de625d02b7535a612e122696.docx]

**Supplementary Information**

**Chromosome-resolved genome assemblies of *Rhodotorula toruloides* reveal abnormal chromosomal evolution under artificial culture conditions**

Yuuki Kobayashi, Moriya Ohkuma, Keita Aoki, Naoto Tanaka, and Masako Takashima


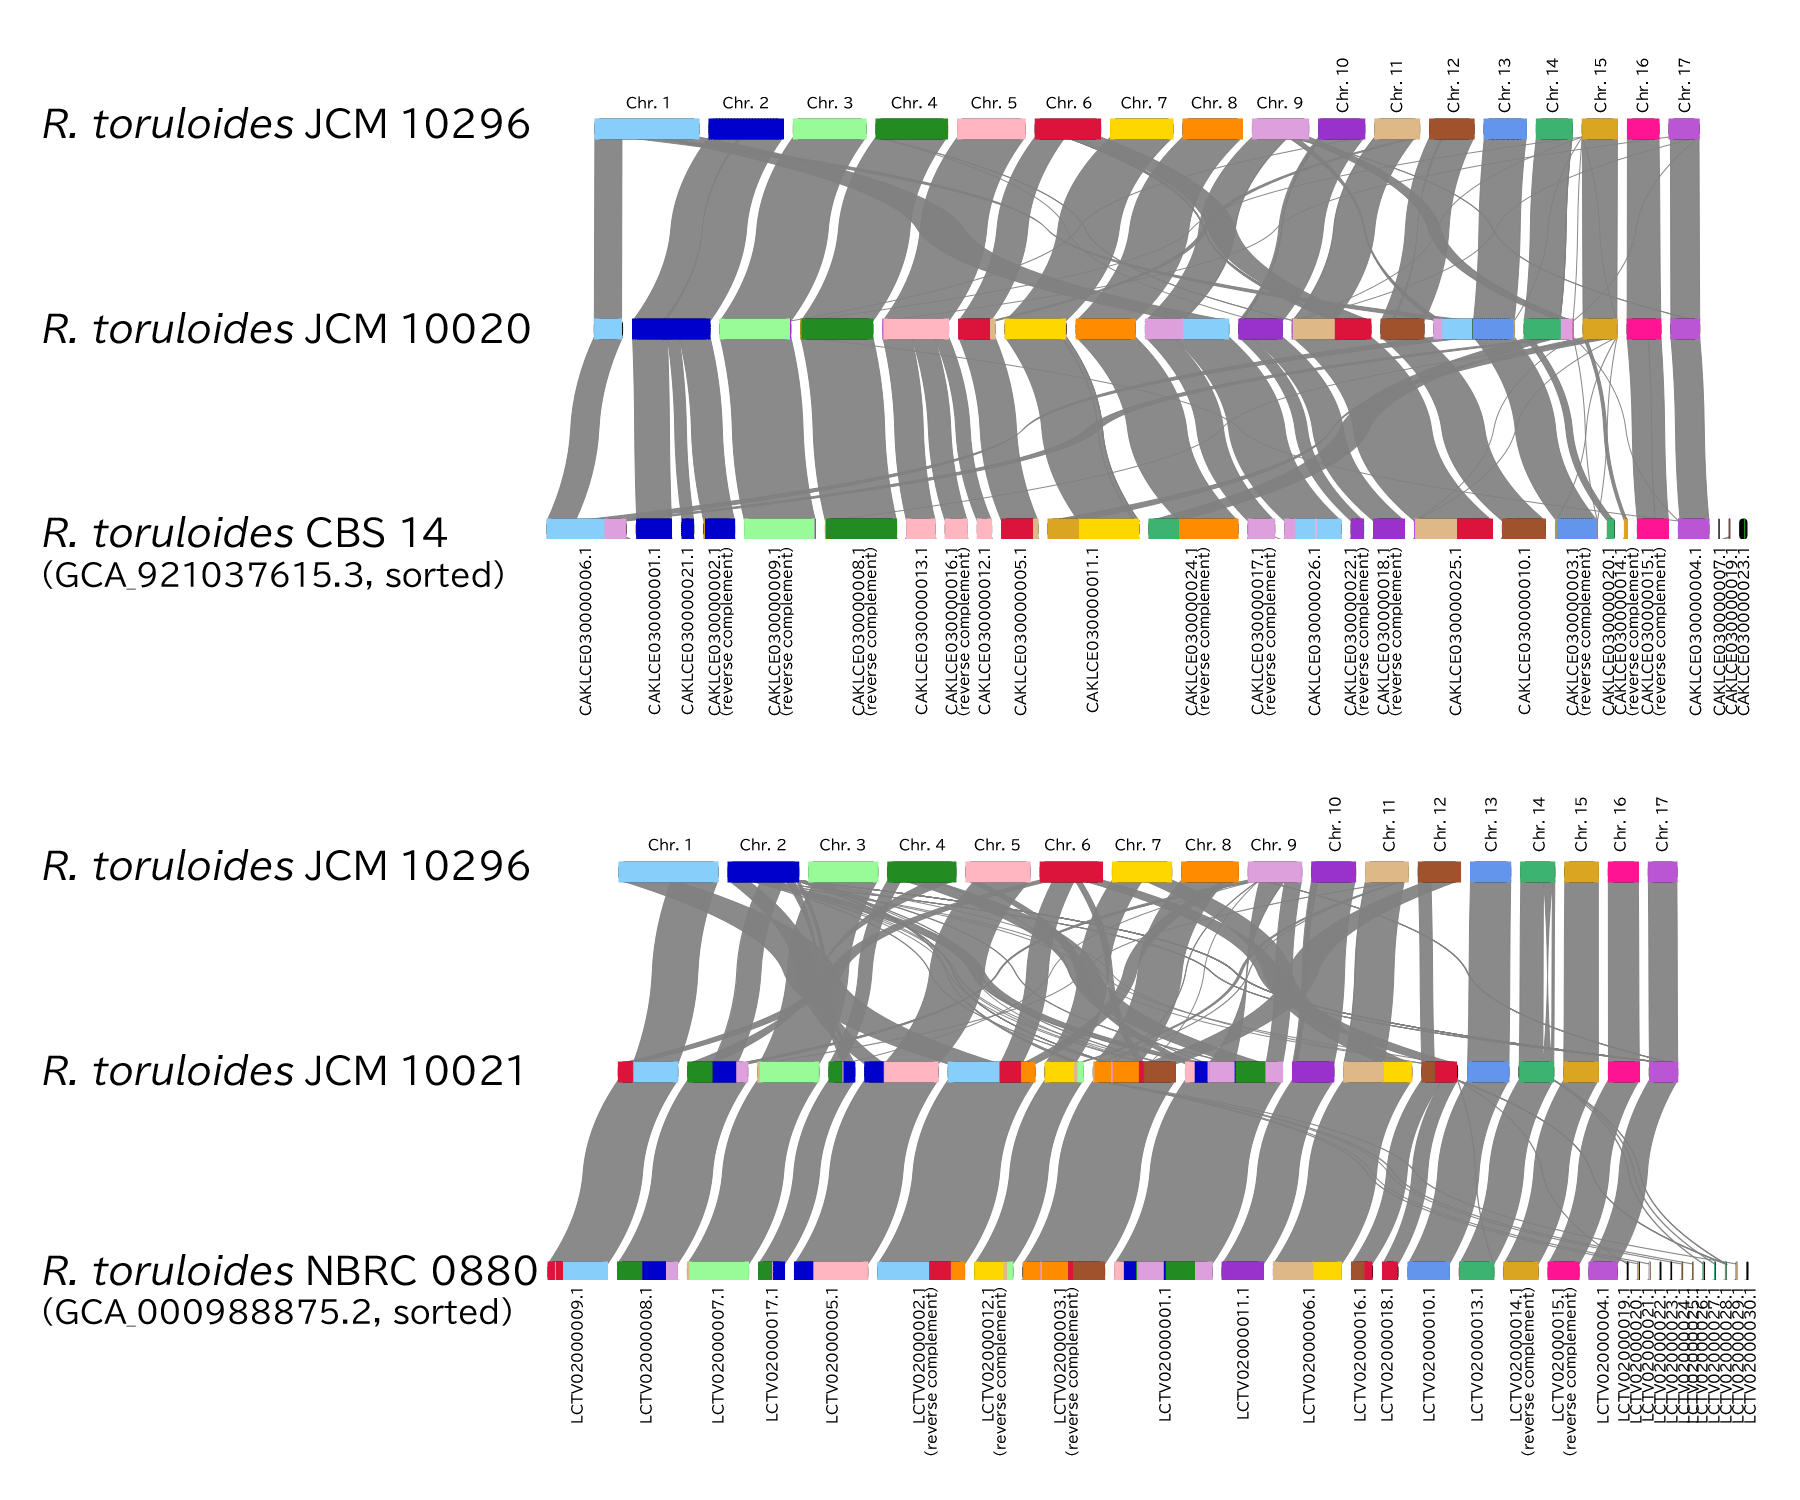


**Figure S1.** Comparison of chromosome macrosynteny among *R. toruloides* strains regarded as the same isolate. Upper panel: Comparison between JCM 10020 and CBS 14, along with JCM 10296, which exhibits canonical chromosome macrosynteny. Lower panel: Comparison between JCM 10021 and NBRC 0880, along with JCM 10296.


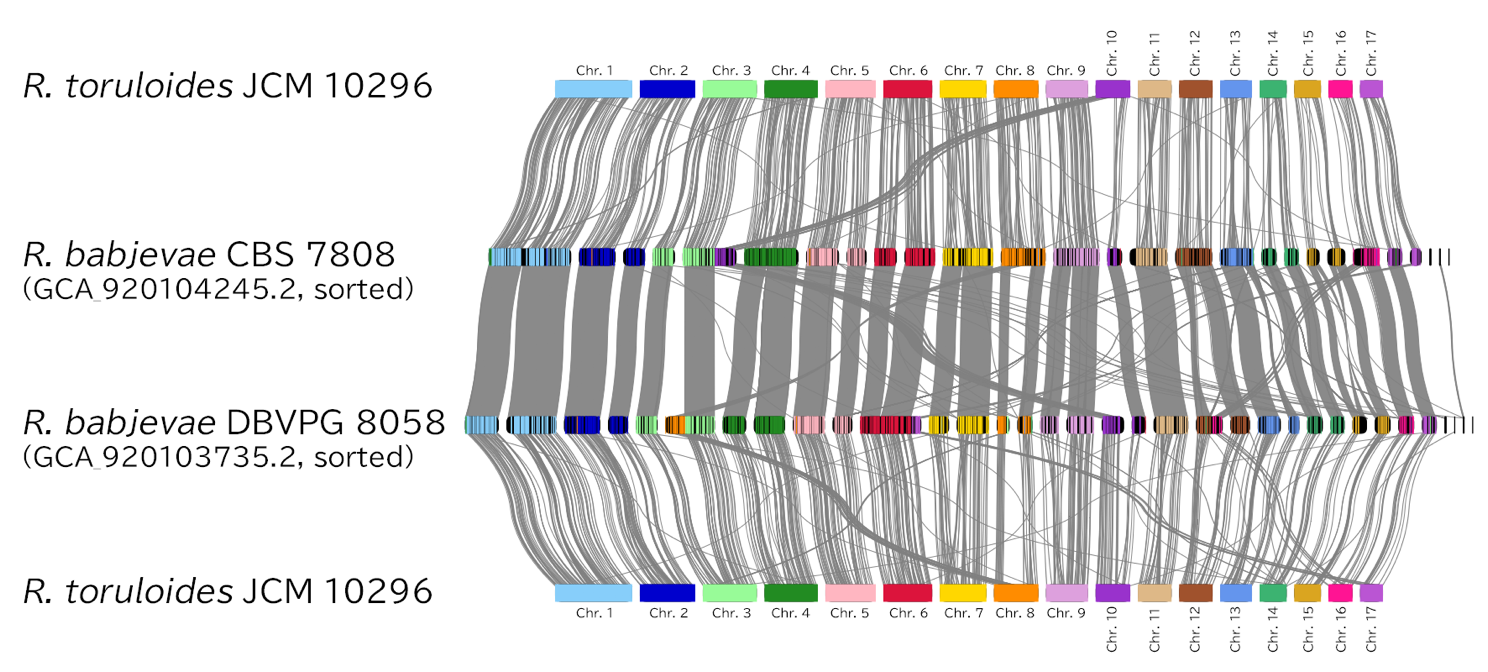


**Figure S2.** Comparison of *R. babjevae* genomes [26] with *R. toruloides* JCM 10296, which has canonical chromosome macrosynteny.


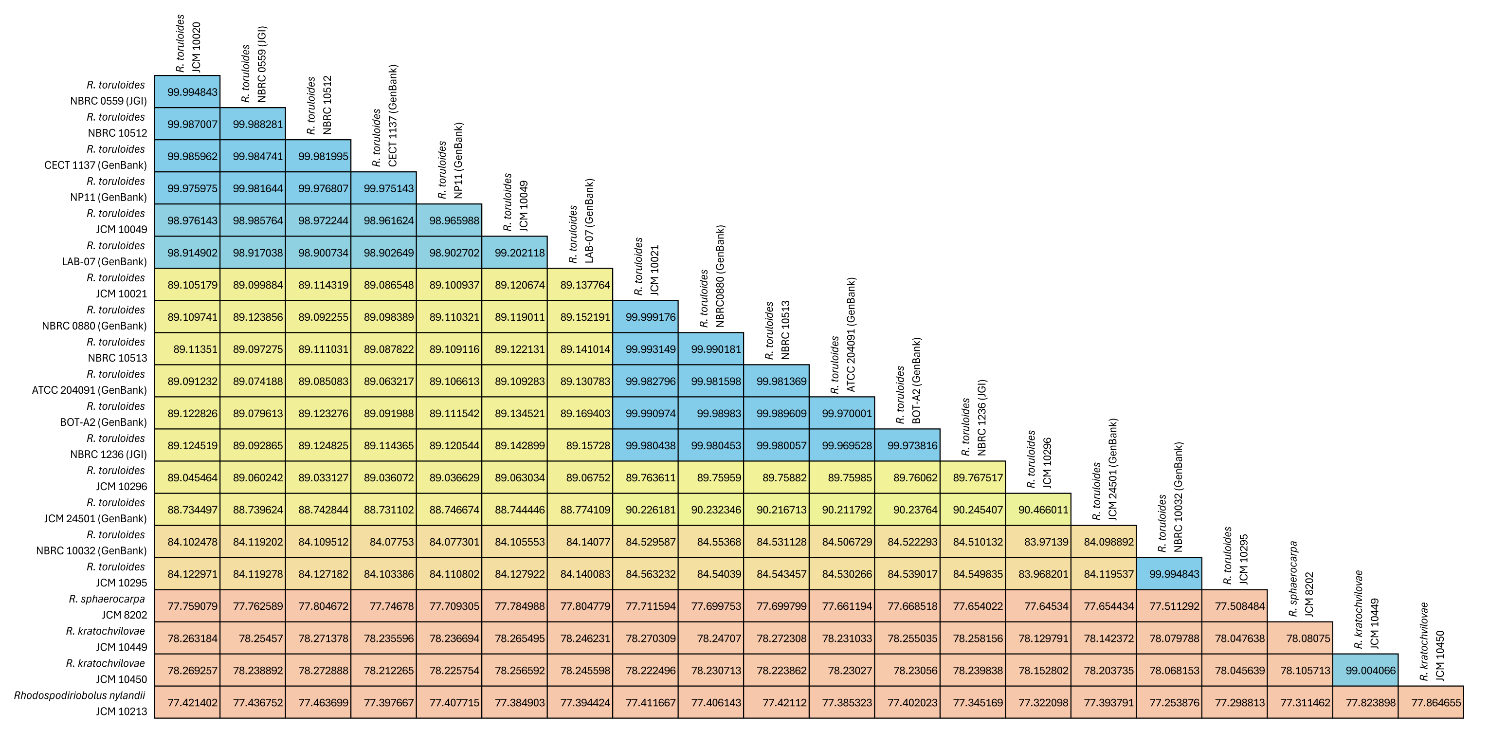


**Figure S3.** ANI matrix of *R. toruloides* and related strains. ANI, Average nucleotide identity
